# Supplementary material for: Study of Comminution Kinetics in an Electrofragmentation Lab-Scale Device
Source: MDPI journal article supplement (doi:10.3390/met12030494), 2022-03-14
Supplement: s1 [file s1]

# Study of Comminution Kinetics in an Electrofragmentation Lab-Scale Device

Angel R. Llera <sup>1</sup>, Ana Díaz <sup>1</sup>, Francisco J. Pedrayes <sup>2</sup>, Juan M. Menéndez-Aguado <sup>1,\*</sup> and Manuel G. Melero <sup>2</sup>

<sup>1</sup> Escuela Politécnica de Mieres, University of Oviedo, c/Gonzalo Gutiérrez Quirós, 33600 Mieres, Spain; uo46888@uniovi.es (A.R.L.); diazdana@uniovi.es (A.D.)

<sup>2</sup> Departamento de Ingeniería Eléctrica, Electrónica, de Computadores y Sistemas, University of Oviedo, 33204 aGijón, Spain; pedrayesjoaquin@uniovi.es (F.J.P.); melero@uniovi.es (M.G.M.)

\* Correspondence: maguado@uniovi.es; Tel.: +34-985-458-033

**Table S1.** Results obtained with monosize 5000/3350, negative polarity.

| Sample code      | 2020071507 | 2020071506 | 2020071505 | 2020071504 | 2020071501 | 2020071502 | 2020071503 |
|------------------|------------|------------|------------|------------|------------|------------|------------|
| Number of pulses | 1          | 2          | 3          | 4          | 5          | 5          | 5          |
| Monosize         | Weight (g) |
| 5000/3350        | 415.3      | 385.8      | 346.5      | 342.3      | 326.7      | 325        | 314.3      |
| 3350/2000        | 52.4       | 57.1       | 71         | 64.5       | 71.2       | 72.9       | 79.5       |
| 2000/1000        | 14.6       | 24.5       | 35.2       | 36.5       | 42.1       | 42.3       | 44.3       |
| 1000/500         | 6.4        | 12.6       | 18         | 21.4       | 21.6       | 21.6       | 22         |
| 500/125          | 5.4        | 11.3       | 17.4       | 21.5       | 22.9       | 21.7       | 23.4       |
| 125/0            | 2.8        | 4.8        | 7.7        | 8.8        | 9.3        | 9.4        | 10.6       |
| <i>Total</i>     | 496.9      | 496.1      | 495.8      | 495        | 493.8      | 492.9      | 494.1      |
| Monosize         | Weight (%) |
| 5000/3350        | 83.58%     | 77.77%     | 69.89%     | 69.15%     | 66.16%     | 65.94%     | 63.61%     |
| 3350/2000        | 10.55%     | 11.51%     | 14.32%     | 13.03%     | 14.42%     | 14.79%     | 16.09%     |
| 2000/1000        | 2.94%      | 4.94%      | 7.10%      | 7.37%      | 8.53%      | 8.58%      | 8.97%      |
| 1000/500         | 1.29%      | 2.54%      | 3.63%      | 4.32%      | 4.37%      | 4.38%      | 4.45%      |
| 500/125          | 1.09%      | 2.28%      | 3.51%      | 4.34%      | 4.64%      | 4.40%      | 4.74%      |

|              |                   |                   |                   |                   |                   |                   |                   |
|--------------|-------------------|-------------------|-------------------|-------------------|-------------------|-------------------|-------------------|
| 125/0        | 0.56%             | 0.97%             | 1.55%             | 1.78%             | 1.88%             | 1.91%             | 2.15%             |
| <i>Total</i> | <i>100%</i>       |
| Size         | Cum. oversize (%) |
| 3350         | 83.58%            | 77.77%            | 69.89%            | 69.15%            | 66.16%            | 65.94%            | 63.61%            |
| 2000         | 94.12%            | 89.28%            | 84.21%            | 82.18%            | 80.58%            | 80.73%            | 79.70%            |
| 1000         | 97.06%            | 94.21%            | 91.31%            | 89.56%            | 89.10%            | 89.31%            | 88.67%            |
| 500          | 98.35%            | 96.75%            | 94.94%            | 93.88%            | 93.48%            | 93.69%            | 93.12%            |
| 125          | 99.44%            | 99.03%            | 98.45%            | 98.22%            | 98.12%            | 98.09%            | 97.85%            |

**Table S2.** Results obtained with monosize 5000/3350, positive polarity.

[illegible]

| Size | Cum. oversize (%) |
|------|-------------------|-------------------|-------------------|-------------------|-------------------|-------------------|-------------------|
| 3350 | 84.67%            | 80.89%            | 73.03%            | 72.00%            | 65.89%            | 61.95%            | 64.68%            |
| 2000 | 94.44%            | 90.35%            | 86.40%            | 85.09%            | 81.03%            | 79.42%            | 79.74%            |
| 1000 | 97.27%            | 94.90%            | 92.67%            | 91.89%            | 89.61%            | 88.20%            | 88.42%            |
| 500  | 98.43%            | 97.05%            | 95.75%            | 95.30%            | 93.95%            | 92.88%            | 93.04%            |
| 125  | 99.46%            | 99.06%            | 98.71%            | 98.56%            | 98.21%            | 97.81%            | 97.92%            |

**Table S3.** Results obtained with monosize 3350/2000, negative polarity.

[illegible]

|      |        |        |        |        |        |        |        |
|------|--------|--------|--------|--------|--------|--------|--------|
| 2000 | 88.25% | 81.25% | 75.36% | 73.32% | 64.45% | 63.54% | 65.39% |
| 1000 | 95.72% | 92.02% | 89.91% | 88.53% | 84.47% | 84.07% | 84.30% |
| 500  | 97.81% | 95.49% | 94.28% | 93.40% | 90.95% | 90.82% | 90.80% |
| 125  | 99.40% | 98.32% | 97.91% | 97.49% | 96.55% | 96.54% | 96.23% |

**Table S4.** Results obtained with monosize 3350/2000, positive polarity.

| Sample code      | 2020072108        | 2020072107        | 2020072106        | 2020072104        | 2020072101        | 2020072102        | 2020072103        |
|------------------|-------------------|-------------------|-------------------|-------------------|-------------------|-------------------|-------------------|
| Number of pulses | 1                 | 2                 | 3                 | 4                 | 5                 | 5                 | 5                 |
| Monosize         | Weight (g)        |
| 5000/3350        | 0.0               | 0.0               | 0.0               | 0.0               | 0.0               | 0.0               | 0.0               |
| 3350/2000        | 436.2             | 396.1             | 370.3             | 346.7             | 315.5             | 327.4             | 328.2             |
| 2000/1000        | 38.5              | 59.8              | 75.4              | 84                | 101.7             | 94.3              | 93.1              |
| 1000/500         | 11.1              | 19                | 23.3              | 28.1              | 33.7              | 32.5              | 33.1              |
| 500/125          | 8.5               | 15                | 18.8              | 23.9              | 29                | 27.5              | 27.7              |
| 125/0            | 5.4               | 8.7               | 11.3              | 15.5              | 17.9              | 17.8              | 17.7              |
| <i>Total</i>     | 499.7             | 498.6             | 499.1             | 498.2             | 497.8             | 499.5             | 499.8             |
| Monosize         | Weight (%)        |
| 5000/3350        | 0.00%             | 0.00%             | 0.00%             | 0.00%             | 0.00%             | 0.00%             | 0.00%             |
| 3350/2000        | 87.29%            | 79.44%            | 74.19%            | 69.59%            | 63.38%            | 65.55%            | 65.67%            |
| 2000/1000        | 7.70%             | 11.99%            | 15.11%            | 16.86%            | 20.43%            | 18.88%            | 18.63%            |
| 1000/500         | 2.22%             | 3.81%             | 4.67%             | 5.64%             | 6.77%             | 6.51%             | 6.62%             |
| 500/125          | 1.70%             | 3.01%             | 3.77%             | 4.80%             | 5.83%             | 5.51%             | 5.54%             |
| 125/0            | 1.08%             | 1.74%             | 2.26%             | 3.11%             | 3.60%             | 3.56%             | 3.54%             |
| <i>Total</i>     | 100%              | 100%              | 100%              | 100%              | 100%              | 100%              | 100%              |
| Size             | Cum. oversize (%) |
| 3350             | 0.00%             | 0.00%             | 0.00%             | 0.00%             | 0.00%             | 0.00%             | 0.00%             |
| 2000             | 87.29%            | 79.44%            | 74.19%            | 69.59%            | 63.38%            | 65.55%            | 65.67%            |
| 1000             | 95.00%            | 91.44%            | 89.30%            | 86.45%            | 83.81%            | 84.42%            | 84.29%            |

|     |        |        |        |        |        |        |        |
|-----|--------|--------|--------|--------|--------|--------|--------|
| 500 | 97.22% | 95.25% | 93.97% | 92.09% | 90.58% | 90.93% | 90.92% |
| 125 | 98.92% | 98.26% | 97.74% | 96.89% | 96.40% | 96.44% | 96.46% |

**Table S5.** Results obtained with monosize 2000/1000, negative polarity.

| Sample code      | 2020072707        | 2020072706        | 2020072705        | 2020072704        | 2020072701        | 2020072702        | 2020072703        |
|------------------|-------------------|-------------------|-------------------|-------------------|-------------------|-------------------|-------------------|
| Number of pulses | 1                 | 2                 | 3                 | 4                 | 5                 | 5                 | 5                 |
| Monosize         | Weight (g)        |
| 5000/3350        | 0.0               | 0.0               | 0.0               | 0.0               | 0.0               | 0.0               | 0.0               |
| 3350/2000        | 0.0               | 0.0               | 0.0               | 0.0               | 0.0               | 0.0               | 0.0               |
| 2000/1000        | 453               | 446.7             | 436.3             | 414.8             | 412.2             | 397.8             | 409.8             |
| 1000/500         | 34.7              | 39.4              | 43.1              | 55.8              | 57.8              | 66.2              | 59.4              |
| 500/125          | 7.2               | 8.1               | 11.1              | 17.9              | 17.4              | 22                | 18.3              |
| 125/0            | 5.8               | 7.4               | 9.5               | 12.6              | 12.1              | 14.9              | 13.7              |
| <i>Total</i>     | <i>500.7</i>      | <i>501.6</i>      | <i>500</i>        | <i>501.1</i>      | <i>499.5</i>      | <i>500.9</i>      | <i>501.2</i>      |
| Monosize         | Weight (%)        |
| 5000/3350        | 0.00%             | 0.00%             | 0.00%             | 0.00%             | 0.00%             | 0.00%             | 0.00%             |
| 3350/2000        | 0.00%             | 0.00%             | 0.00%             | 0.00%             | 0.00%             | 0.00%             | 0.00%             |
| 2000/1000        | 90.47%            | 89.06%            | 87.26%            | 82.78%            | 82.52%            | 79.42%            | 81.76%            |
| 1000/500         | 6.93%             | 7.85%             | 8.62%             | 11.14%            | 11.57%            | 13.22%            | 11.85%            |
| 500/125          | 1.44%             | 1.61%             | 2.22%             | 3.57%             | 3.48%             | 4.39%             | 3.65%             |
| 125/0            | 1.16%             | 1.48%             | 1.90%             | 2.51%             | 2.42%             | 2.97%             | 2.73%             |
| <i>Total</i>     | <i>100%</i>       |
| Size             | Cum. oversize (%) |
| 3350             | 0.00%             | 0.00%             | 0.00%             | 0.00%             | 0.00%             | 0.00%             | 0.00%             |
| 2000             | 0.00%             | 0.00%             | 0.00%             | 0.00%             | 0.00%             | 0.00%             | 0.00%             |
| 1000             | 90.47%            | 89.06%            | 87.26%            | 82.78%            | 82.52%            | 79.42%            | 81.76%            |
| 500              | 97.40%            | 96.91%            | 95.88%            | 93.91%            | 94.09%            | 92.63%            | 93.62%            |
| 125              | 98.84%            | 98.52%            | 98.10%            | 97.49%            | 97.58%            | 97.03%            | 97.27%            |

**Table S6.** Results obtained with monosize 2000/1000, positive polarity.

| Sample code      | 2020072307        | 2020072306        | 2020072305        | 2020072304        | 2020072301        | 2020072302        | 2020072303        |
|------------------|-------------------|-------------------|-------------------|-------------------|-------------------|-------------------|-------------------|
| Number of pulses | 1                 | 2                 | 3                 | 4                 | 5                 | 5                 | 5                 |
| Monosize         | Weight (g)        |
| 5000/3350        | 0.0               | 0.0               | 0.0               | 0.0               | 0.0               | 0.0               | 0.0               |
| 3350/2000        | 0.0               | 0.0               | 0.0               | 0.0               | 0.0               | 0.0               | 0.0               |
| 2000/1000        | 458.7             | 444.4             | 426.2             | 423               | 405.2             | 404.4             | 409.1             |
| 1000/500         | 31.9              | 40.7              | 50.5              | 54                | 62.7              | 62.7              | 61.3              |
| 500/125          | 5.1               | 8.8               | 14.3              | 13.6              | 17.4              | 17.9              | 17.1              |
| 125/0            | 5.3               | 7.3               | 9.7               | 11                | 10.9              | 13.2              | 12.4              |
| <i>Total</i>     | <i>501</i>        | <i>501.2</i>      | <i>500.7</i>      | <i>501.6</i>      | <i>496.2</i>      | <i>498.2</i>      | <i>499.9</i>      |
| Monosize         | Weight (%)        |
| 5000/3350        | 0.00%             | 0.00%             | 0.00%             | 0.00%             | 0.00%             | 0.00%             | 0.00%             |
| 3350/2000        | 0.00%             | 0.00%             | 0.00%             | 0.00%             | 0.00%             | 0.00%             | 0.00%             |
| 2000/1000        | 91.56%            | 88.67%            | 85.12%            | 84.33%            | 81.66%            | 81.17%            | 81.84%            |
| 1000/500         | 6.37%             | 8.12%             | 10.09%            | 10.77%            | 12.64%            | 12.59%            | 12.26%            |
| 500/125          | 1.02%             | 1.76%             | 2.86%             | 2.71%             | 3.51%             | 3.59%             | 3.42%             |
| 125/0            | 1.06%             | 1.46%             | 1.94%             | 2.19%             | 2.20%             | 2.65%             | 2.48%             |
| <i>Total</i>     | <i>100%</i>       |
| Size             | Cum. oversize (%) |
| 3350             | 0.00%             | 0.00%             | 0.00%             | 0.00%             | 0.00%             | 0.00%             | 0.00%             |
| 2000             | 0.00%             | 0.00%             | 0.00%             | 0.00%             | 0.00%             | 0.00%             | 0.00%             |
| 1000             | 91.56%            | 88.67%            | 85.12%            | 84.33%            | 81.66%            | 81.17%            | 81.84%            |
| 500              | 97.92%            | 96.79%            | 95.21%            | 95.10%            | 94.30%            | 93.76%            | 94.10%            |
| 125              | 98.94%            | 98.54%            | 98.06%            | 97.81%            | 97.80%            | 97.35%            | 97.52%            |

**Table S7.** Results obtained with monosize 1000/500, negative polarity.

| Sample code      | 2020072807        | 2020072806        | 2020072805        | 2020072804        | 2020072801        | 2020072802        | 2020072803        |
|------------------|-------------------|-------------------|-------------------|-------------------|-------------------|-------------------|-------------------|
| Number of pulses | 1                 | 2                 | 3                 | 4                 | 5                 | 5                 | 5                 |
| Monosize         | Weight (g)        |
| 5000/3350        | 0.0               | 0.0               | 0.0               | 0.0               | 0.0               | 0.0               | 0.0               |
| 3350/2000        | 0.0               | 0.0               | 0.0               | 0.0               | 0.0               | 0.0               | 0.0               |
| 2000/1000        | 0.0               | 0.0               | 0.0               | 0.0               | 0.0               | 0.0               | 0.0               |
| 1000/500         | 458               | 445.2             | 436.7             | 430.1             | 426.5             | 421.1             | 423.4             |
| 500/125          | 34.9              | 44.8              | 50.5              | 55.5              | 55.8              | 60.8              | 58.6              |
| 125/0            | 7.3               | 9.7               | 12.3              | 13.9              | 14.7              | 16.5              | 15.2              |
| <i>Total</i>     | <i>500.2</i>      | <i>499.7</i>      | <i>499.5</i>      | <i>499.5</i>      | <i>497</i>        | <i>498.4</i>      | <i>497.2</i>      |
| Monosize         | Weight (%)        |
| 5000/3350        | 0.00%             | 0.00%             | 0.00%             | 0.00%             | 0.00%             | 0.00%             | 0.00%             |
| 3350/2000        | 0.00%             | 0.00%             | 0.00%             | 0.00%             | 0.00%             | 0.00%             | 0.00%             |
| 2000/1000        | 0.00%             | 0.00%             | 0.00%             | 0.00%             | 0.00%             | 0.00%             | 0.00%             |
| 1000/500         | 91.56%            | 89.09%            | 87.43%            | 86.11%            | 85.81%            | 84.49%            | 85.16%            |
| 500/125          | 6.98%             | 8.97%             | 10.11%            | 11.11%            | 11.23%            | 12.20%            | 11.79%            |
| 125/0            | 1.46%             | 1.94%             | 2.46%             | 2.78%             | 2.96%             | 3.31%             | 3.06%             |
| <i>Total</i>     | <i>100%</i>       |
| Size             | Cum. oversize (%) |
| 3350             | 0.00%             | 0.00%             | 0.00%             | 0.00%             | 0.00%             | 0.00%             | 0.00%             |
| 2000             | 0.00%             | 0.00%             | 0.00%             | 0.00%             | 0.00%             | 0.00%             | 0.00%             |
| 1000             | 0.00%             | 0.00%             | 0.00%             | 0.00%             | 0.00%             | 0.00%             | 0.00%             |
| 500              | 91.56%            | 89.09%            | 87.43%            | 86.11%            | 85.81%            | 84.49%            | 85.16%            |
| 125              | 98.54%            | 98.06%            | 97.54%            | 97.22%            | 97.04%            | 96.69%            | 96.94%            |

**Table S8.** Results obtained with monosize 1000/500, positive polarity.

| Sample code      | 2020073007        | 2020073006        | 202073005         | 2020073004        | 2020073001        | 2020073002        | 2020073003        |
|------------------|-------------------|-------------------|-------------------|-------------------|-------------------|-------------------|-------------------|
| Number of pulses | 1                 | 2                 | 3                 | 4                 | 5                 | 5                 | 5                 |
| Monosize         | Weight (g)        |
| 5000/3350        | 0.0               | 0.0               | 0.0               | 0.0               | 0.0               | 0.0               | 0.0               |
| 3350/2000        | 0.0               | 0.0               | 0.0               | 0.0               | 0.0               | 0.0               | 0.0               |
| 2000/1000        | 0.0               | 0.0               | 0.0               | 0.0               | 0.0               | 0.0               | 0.0               |
| 1000/500         | 446.9             | 444               | 435.9             | 435.8             | 421.5             | 430.9             | 425.6             |
| 500/125          | 44.4              | 45.5              | 51.2              | 51.3              | 61.3              | 55.5              | 58.3              |
| 125/0            | 8.4               | 10.7              | 12.6              | 12.2              | 15.1              | 14                | 15.1              |
| <i>Total</i>     | <i>499.7</i>      | <i>500.2</i>      | <i>499.7</i>      | <i>499.3</i>      | <i>497.9</i>      | <i>500.4</i>      | <i>499</i>        |
| Monosize         | Weight (%)        |
| 5000/3350        | 0.00%             | 0.00%             | 0.00%             | 0.00%             | 0.00%             | 0.00%             | 0.00%             |
| 3350/2000        | 0.00%             | 0.00%             | 0.00%             | 0.00%             | 0.00%             | 0.00%             | 0.00%             |
| 2000/1000        | 0.00%             | 0.00%             | 0.00%             | 0.00%             | 0.00%             | 0.00%             | 0.00%             |
| 1000/500         | 89.43%            | 88.76%            | 87.23%            | 87.28%            | 84.66%            | 86.11%            | 85.29%            |
| 500/125          | 8.89%             | 9.10%             | 10.25%            | 10.27%            | 12.31%            | 11.09%            | 11.68%            |
| 125/0            | 1.68%             | 2.14%             | 2.52%             | 2.44%             | 3.03%             | 2.80%             | 3.03%             |
| <i>Total</i>     | <i>100%</i>       |
| Size             | Cum. oversize (%) |
| 3350             | 0.00%             | 0.00%             | 0.00%             | 0.00%             | 0.00%             | 0.00%             | 0.00%             |
| 2000             | 0.00%             | 0.00%             | 0.00%             | 0.00%             | 0.00%             | 0.00%             | 0.00%             |
| 1000             | 0.00%             | 0.00%             | 0.00%             | 0.00%             | 0.00%             | 0.00%             | 0.00%             |
| 500              | 89.43%            | 88.76%            | 87.23%            | 87.28%            | 84.66%            | 86.11%            | 85.29%            |
| 125              | 98.32%            | 97.86%            | 97.48%            | 97.56%            | 96.97%            | 97.20%            | 96.97%            |



**Table S9.** Results obtained with monosize 500/125, negative polarity.

| Sample code      | 2020080307        | 2020080306        | 2020080305        | 2020080304        | 2020080301        | 2020080302        | 2020080303        |
|------------------|-------------------|-------------------|-------------------|-------------------|-------------------|-------------------|-------------------|
| Number of pulses | 1                 | 2                 | 3                 | 4                 | 5                 | 5                 | 5                 |
| Monosize         | Weight (g)        |
| 5000/3350        | 0.0               | 0.0               | 0.0               | 0.0               | 0.0               | 0.0               | 0.0               |
| 3350/2000        | 0.0               | 0.0               | 0.0               | 0.0               | 0.0               | 0.0               | 0.0               |
| 2000/1000        | 0.0               | 0.0               | 0.0               | 0.0               | 0.0               | 0.0               | 0.0               |
| 1000/500         | 0.0               | 0.0               | 0.0               | 0.0               | 0.0               | 0.0               | 0.0               |
| 500/125          | 394.2             | 384.8             | 410.3             | 392.2             | 342.3             | 384.3             | 387.5             |
| 125/0            | 104.8             | 113.1             | 88.5              | 104.7             | 149.5             | 113               | 110.3             |
| <i>Total</i>     | 499               | 497.9             | 498.8             | 496.9             | 491.8             | 497.3             | 497.8             |
| Monosize         | Weight (%)        |
| 5000/3350        | 0.00%             | 0.00%             | 0.00%             | 0.00%             | 0.00%             | 0.00%             | 0.00%             |
| 3350/2000        | 0.00%             | 0.00%             | 0.00%             | 0.00%             | 0.00%             | 0.00%             | 0.00%             |
| 2000/1000        | 0.00%             | 0.00%             | 0.00%             | 0.00%             | 0.00%             | 0.00%             | 0.00%             |
| 1000/500         | 0.00%             | 0.00%             | 0.00%             | 0.00%             | 0.00%             | 0.00%             | 0.00%             |
| 500/125          | 79.00%            | 77.28%            | 82.26%            | 78.93%            | 69.60%            | 77.28%            | 77.84%            |
| 125/0            | 21.00%            | 22.72%            | 17.74%            | 21.07%            | 30.40%            | 22.72%            | 22.16%            |
| <i>Total</i>     | 100%              | 100%              | 100%              | 100%              | 100%              | 100%              | 100%              |
| Size             | Cum. oversize (%) |
| 3350             | 0.00%             | 0.00%             | 0.00%             | 0.00%             | 0.00%             | 0.00%             | 0.00%             |
| 2000             | 0.00%             | 0.00%             | 0.00%             | 0.00%             | 0.00%             | 0.00%             | 0.00%             |
| 1000             | 0.00%             | 0.00%             | 0.00%             | 0.00%             | 0.00%             | 0.00%             | 0.00%             |
| 500              | 0.00%             | 0.00%             | 0.00%             | 0.00%             | 0.00%             | 0.00%             | 0.00%             |
| 125              | 79.00%            | 77.28%            | 82.26%            | 78.93%            | 69.60%            | 77.28%            | 77.84%            |

**Table S10.** Results obtained with monosize 500/125, positive polarity.

| Sample code      | 2020073101        | 2020073107        | 2020073106        | 2020073105        | 2020073102        | 2020073103        | 2020073104        |
|------------------|-------------------|-------------------|-------------------|-------------------|-------------------|-------------------|-------------------|
| Number of pulses | 1                 | 2                 | 3                 | 4                 | 5                 | 5                 | 5                 |
| Monosize         | Weight (g)        |
| 5000/3350        | 0.0               | 0.0               | 0.0               | 0.0               | 0.0               | 0.0               | 0.0               |
| 3350/2000        | 0.0               | 0.0               | 0.0               | 0.0               | 0.0               | 0.0               | 0.0               |
| 2000/1000        | 0.0               | 0.0               | 0.0               | 0.0               | 0.0               | 0.0               | 0.0               |
| 1000/500         | 0.0               | 0.0               | 0.0               | 0.0               | 0.0               | 0.0               | 0.0               |
| 500/125          | 392.6             | 384               | 400.9             | 389.2             | 386.5             | 400.8             | 379.4             |
| 125/0            | 105.9             | 112.4             | 88.8              | 107.3             | 110.3             | 95.1              | 115.2             |
| <i>Total</i>     | <i>498.5</i>      | <i>496.4</i>      | <i>489.7</i>      | <i>496.5</i>      | <i>496.8</i>      | <i>495.9</i>      | <i>494.6</i>      |
| Monosize         | Weight (%)        |
| 5000/3350        | 0.00%             | 0.00%             | 0.00%             | 0.00%             | 0.00%             | 0.00%             | 0.00%             |
| 3350/2000        | 0.00%             | 0.00%             | 0.00%             | 0.00%             | 0.00%             | 0.00%             | 0.00%             |
| 2000/1000        | 0.00%             | 0.00%             | 0.00%             | 0.00%             | 0.00%             | 0.00%             | 0.00%             |
| 1000/500         | 0.00%             | 0.00%             | 0.00%             | 0.00%             | 0.00%             | 0.00%             | 0.00%             |
| 500/125          | 78.76%            | 77.36%            | 81.87%            | 78.39%            | 77.80%            | 80.82%            | 76.71%            |
| 125/0            | 21.24%            | 22.64%            | 18.13%            | 21.61%            | 22.20%            | 19.18%            | 23.29%            |
| <i>Total</i>     | <i>100%</i>       |
| Size             | Cum. oversize (%) |
| 3350             | 0.00%             | 0.00%             | 0.00%             | 0.00%             | 0.00%             | 0.00%             | 0.00%             |
| 2000             | 0.00%             | 0.00%             | 0.00%             | 0.00%             | 0.00%             | 0.00%             | 0.00%             |
| 1000             | 0.00%             | 0.00%             | 0.00%             | 0.00%             | 0.00%             | 0.00%             | 0.00%             |
| 500              | 0.00%             | 0.00%             | 0.00%             | 0.00%             | 0.00%             | 0.00%             | 0.00%             |
| 125              | 78.76%            | 77.36%            | 81.87%            | 78.39%            | 77.80%            | 80.82%            | 76.71%            |

**Table S11.** PSD values (modeled and real), feed 3350/2000 monosize.

| Size ( $\mu\text{m}$ ) | Negative polarity |           |           | Positive polarity |           |           |
|------------------------|-------------------|-----------|-----------|-------------------|-----------|-----------|
|                        | Model             | Replica 2 | Replica 3 | Model             | Replica 2 | Replica 3 |
| 3350                   | 0.00%             | 0.00%     | 0.00%     | 0.00%             | 0.00%     | 0.00%     |
| 2000                   | 66.94%            | 63.54%    | 65.39%    | 64.51%            | 65.55%    | 65.67%    |
| 1000                   | 81.53%            | 84.07%    | 84.30%    | 79.57%            | 84.42%    | 84.29%    |
| 500                    | 89.11%            | 90.82%    | 90.80%    | 87.63%            | 90.93%    | 90.92%    |
| 125                    | 96.32%            | 96.54%    | 96.23%    | 95.45%            | 96.44%    | 96.46%    |

**Table S12.** PSD values (modeled and real), feed 2000/1000 monosize.

| Size ( $\mu\text{m}$ ) | Negative polarity |           |           | Positive polarity |           |           |
|------------------------|-------------------|-----------|-----------|-------------------|-----------|-----------|
|                        | Model             | Replica 2 | Replica 3 | Model             | Replica 2 | Replica 3 |
| 3350                   | 0.00%             | 0.00%     | 0.00%     | 0.00%             | 0.00%     | 0.00%     |
| 2000                   | 0.00%             | 0.00%     | 0.00%     | 0.00%             | 0.00%     | 0.00%     |
| 1000                   | 84.83%            | 79.42%    | 81.76%    | 85.85%            | 81.17%    | 81.84%    |
| 500                    | 93.46%            | 92.63%    | 93.62%    | 93.96%            | 93.76%    | 94.10%    |
| 125                    | 97.17%            | 97.03%    | 97.27%    | 97.27%            | 97.35%    | 97.52%    |

**Table S13.** PSD values (modeled and real), feed 1000/500 monosize.

| Size ( $\mu\text{m}$ ) | Negative polarity |           |           | Positive polarity |           |           |
|------------------------|-------------------|-----------|-----------|-------------------|-----------|-----------|
|                        | Model             | Replica 2 | Replica 3 | Model             | Replica 2 | Replica 3 |
| 3350                   | 0.00%             | 0.00%     | 0.00%     | 0.00%             | 0.00%     | 0.00%     |
| 2000                   | 0.00%             | 0.00%     | 0.00%     | 0.00%             | 0.00%     | 0.00%     |
| 1000                   | 0.00%             | 0.00%     | 0.00%     | 0.00%             | 0.00%     | 0.00%     |
| 500                    | 87.13%            | 84.49%    | 85.16%    | 85.09%            | 86.11%    | 85.29%    |
| 125                    | 95.82%            | 96.69%    | 96.94%    | 95.77%            | 97.20%    | 96.97%    |
